# Supplementary material for: Lack of Support for the Association between Facial Shape and Aggression: A Reappraisal Based on a Worldwide Population Genetics Perspective
Source: PLoS One. 2013 Jan 9;8(1):e52317. doi: 10.1371/journal.pone.0052317 (PMC3541377; doi:10.1371/journal.pone.0052317)
Supplement: Table S1 — Sample details for each database, including Pinker's sociocultural classifications. (XLSX) [file pone.0052317.s002.xlsx]

## Sheet: Howells
Table S1: Sample details concerning the Howells database, including Pinker's sociocultural classifications.
Howells database	Nonstate societies		State societies	Country/region
Sample namea	Simple nomadic hunter-gatherer	More complex			Sample Size
		forager- horticulturalists and/or pastoralists			female/male/total
Ainu		X		North Japan	48/38/86
Andaman	X			Andaman Island	35/35/70
Arikara		X		North America	42/27/69
Atayal		X		Taiwan aboriginal	29/18/47
Australiab	X			Australia	52/49/101
Berg			X	Austria	56/53/109
Buriat		X		Russia	55/54/109
Bushmanc	X			South Africa	41/49/90
Dogon			X	Mali	47/52/99
Easter Island		X		Easter Island	49/37/86
Egyptd			X	Egypt	58/53/111
Eskimo	X			Greenland	53/55/108
Guam		X		Guam Island/Micronesia	30/27/57
Hainan			X	China	45/38/83
Mokapu		X		Hawai	51/49/100
Moriori		X		Chatham Island	57/51/108
North Japan			X	North Japan	55/32/87
Norse			X	Norway	55/55/110
Peru			X	Peru	55/55/110
South Japan			X	Japan	50/41/91
Santa Cruz	X			Santa Cruz Island/California	51/51/102
Tasmania	X			Tasmania	45/42/87
Teita		X		Kenya-Uganda	33/50/83
Tolai	X			Melanesia	56/54/110
Zalavár			X	Hungary	53/45/98
Zulu		X		South Africa	55/46/101
Sources: Howells 1973, 1989, Murdock 1969, Lagance y Swanson n/d.
Note: Since for some of these groups the ethnographic and historical data are scarce and incomplete, some information used to make the classification were compiled from official websites of these peoples.
aThe original nomenclature used by authors is maintained.
b Jarildekald and Warki-Korowalde tribes.
cSan.
d26th-30th Dynasties.
eChumash people.
Howells W W (1973). Cranial Variation in Man. A Study by Multivariate Analysis of Patterns of Differences Among Recent Human Populations. Papers of the Peabody Museum of Archeology and Ethnology. Cambridge, MA: Peabody Museum.
Howells W W (1989). Skull Shapes and the Map. Craniometric Analyses in the Dispersion of Modern Homo. Papers of the Peabody Museum of Archaeology and Ethnology. Cambridge, MA: Peabody Museum.
Rogers R (1995) Destiny's landfall: a history of Guam. Honolulu: University of Hawaii Press. ISBN 0824816781.
Lagace R O,Swanson E C. Society-ANDAMANS. Retrieved from http://lucy.ukc.ac.uk/EthnoAtlas/Hmar/Cult_dir/Culture.7826

## Sheet: Pucciarelli
Supplementary Table 1: Sample details concerning the Howells database, including Pinker's sociocultural classifications.
Pucciareli Database	Nonstate societies		State societies	Country/region
Sample namea	Simple nomadic hunter-gatherer	More complex			Sample Size
		forager- horticulturalists and/or pastoralists			female/male/total
Ainu		X		North Japan/Russia	2/22/24
Aguazuque	X			Colombia	12/9/21
Australian b	X			Australia	6/15/21
Bengali			X	India	12/14/26
Bolivian c		X		Bolivia	3/27/30
Botocudo ES	X			Brazil	8/10/18
Botocudo MG	X			Brazil	6/8/14
Cauca Valley		X		Colombia	2/15/17
Checua	X			Colombia	2/7/9
Ipi-Iboto	X			Venezuela	7/9/16
Maipure	X			Venezuela	12/13/25
Maravas		X		Southern India	5/12/17
Mongol		X		Mongolia	10/7/17
Muisca			X	Colombia	1/12/13
Negrito	X			Phillipines	9/9/18
North Chile		X		Chile	1/17/18
Ourga		X		Mongolia	8/11/19
Paltacalo	X			Ecuador	12/28/40
Pericu	X			Baja California/Mexico	1/20/21
Phillipines				Phillipines	11/13/24
Santa Catarina d	X			Brazil	6/2/8
Tchoutchki e	X			Russia	3/11/14
Tequendama	X			Colombia	4/6/10
Sources: Murdock 1969, Correal-Urrego 1990, Rothhammer and Silva 1989, Pucciarelli et al. 2006.
Note: Since for some of these groups the ethnographic and historical data are scarce and incomplete, some information used to make the classification were compiled from official websites of these peoples.
aThe original nomenclature used by authors is maintained.
b Indefined aborigine group
c Quechua and Aymara
d Sambaqui people
eChukchi
References:
Murdoch G P (1967) Ethnographic atlas: a summary. Pittsburgh: The University of Pittsburgh Press.
Correal Urrego G (1990). Aguazuque : evidencias de cazadores, recolectores y plantadores en la altiplanicie de la Cordillera Oriental. Bogotá. FIAN-Banco de la República.
Rothhammer F, Silva C (1989) People of Andean South America. Am J Phys Anthropol. 78: 403-420.
The maravans of the Southern india. In The asicatic journal and montly register for Britsh, foreign India, Chine and Australia. Vol XXII New series. London. 1837 Wm. H. and Allen and Co.
Pucciarelli E, Neves W A, González-José R, Sardi M L, Ramirez-Rozzi F, et al. (2006) East–West cranial differentiation in pre-Columbian human populations of South America. HOMO. 57: 133–150

## Sheet: 2D
Table S1: Sample details concerning the 2D database, including Pinker's sociocultural classifications.
2D GM database	Nonstate societies		State societies	Country/region	Sample Size
Sample namea	Simple nomadic hunter-gatherer	More complex forager- horticulturalists and/or pastoralists			female/male/total
Araucanian		X		Argentina	25/17/42
Australian b	X			Australia	16/16/32
Baja California	X			México	9/10/19
Bolivianc		X		Bolivia	6/12/18
Buriat		X		Russia	3/5/8
Calama		X		North Chile	11/12/23
California		X		USA	19/26/45
Eskimo	X			Greenland	28/19/47
Maipure	X			Venezuela	17/21/38
Ourga		X		Mongolia	8/8/16
Paltacalo	X			Ecuador	26/30/56
Pampa Grande		X		Argentina	15/14/29
Peru		X		Peru	16/9/25
Rio Negrod	X			Argentina	9/9/18
Tchoutchki e	X			Russia	3/11/14
Tehuelche	X			Patagonia/ Argentina	12/16/28
Tlatelolco			X	Mexico	11/20/31
Wamba			X	Spain	31/28/59
Zarautz			X	Spain	12/20/32
Sources: Murdock, 1969; West, 2009; González-José et al. 2003, Rosales-López & Fujita 2000, González-José et al 2007,
Note: Since for some of these groups the ethnographic and historical data are scarce and incomplete, some information used to make the classification were compiled from official websites of these peoples.
aThe original nomenclature used by authors is maintained.
b Indefined aborigine group
cQuechua and Aymara
dPatagones
eChukchi
Rosales-López, A. & Fujita, H. 2000 La Antigua California Prehispánica: la vida costera en El Conchalito. INAH Meéxico.
González-José, R., Martínez-Abadías, N., González-Martín, A., Bautista-Martínez, J., Gómez-Valdés, J., Quinto, M. & Hernández, M. (2007) Detection of a population replacement at the Classic-Postclassic transition in Mexico. Proc Biol Sci. 274(1610), 681-8
González-José, R., González-Martín, A., Hernández, M., Pucciarelli, H. M., Sardi, M., Rosales, A. & Van Der Molen, S. (2003). Craniometric evidence for Palaeoamerican survival in Baja California. Nature. 425(6953), 62-5. (doi:10.1038/nature01816).
West, B.A. 2009 Encyclopedia of the Peoples of Asia and Oceania. Infobase Publishing, New York.

## Sheet: 3D
Table S1: Sample details concerning the 3D database, including Pinker's sociocultural classifications.
3D GM database	Nonstate societies		State societies	Country/region	Sample Size
Sample namea	Simple nomadic hunter-gatherer	More complex forager- horticulturalists and/or pastoralists			female/male/total
Aleutians	X			Alaska	6/4/10
Araucanians		X		Argentina	23/16/39
Bolivians		X		Bolivia	5/12/17
California	X			USA	20/8/28
Candelaria / Paila	X			Mexico	45/63/108
Eskimo	X			Greenland	27/8/35
Hallstat			X	Austria	126/184/310
Indian Knoll	X			USA	34/30/64
Labrador	X			Canada	21/10/31
Pampa Grande		X		Argentina	14/9/23
Río Negro	X			Argentina	9/9/18
Tlatelolco			X	Mexico	15/20/35
Wamba			X	Spain	36/28/64
Sources: Romano 2005, López-Bueis, I. 1998, Trancho et al. 1992, Fernández 2001, González-José et al. 2007,
aThe original nomenclature used by authors is not maintained.
References:
Romano, A. 2005 Los restos óseos humanos de la Cueva de La Candelaria, Coahuila: Craneología. Vol. 477. Colección científica. Instituto Nacional de Antropología e Historia. Mexico D. F.
López-Bueis, I. 1998 Indicadores de presión ambiental y dimorfismo sexual en los huesos largos de una población española (Wamba, Valladolid). Memoria para la obtención del grado de doctor en Ciencias Biológicas. Universidad Complutense de Madrid.
Trancho, G.J., Jiménez, S. & Robledo B. 1992 Non-metric traits in the human skull from Spanish populatión (Wamba, XV-XVII ad) VIIth Congress European Anthropological Association.
Fernández M. G. 2001. Análisis morfométrico de una colección de cráneos del Museo de Antropología de la escuela de Medicina Legal. Memoria para la obtención del grado de doctor en Ciencias Biológicas. Universidad Complutense de Madrid.
González-José, R., Martínez-Abadías, N., González-Martín, A., Bautista-Martínez, J., Gómez-Valdés, J., Quinto, M. & Hernández, M. (2007) Detection of a population replacement at the Classic-Postclassic transition in Mexico. Proc Biol Sci. 274(1610), 681-8

## Sheet: Patagonia
Table S1: Sample details concerning the Patagons database, including Pinker's sociocultural classifications.
Patagonians database	Nonstate societies		State societies	Country/region	Sample Size
Sample namea	Simple nomadic hunter-gatherer	More complex forager- horticulturalists and/or pastoralists			female/male/total
Marine Fueguians	X			Argentina	29/19/48
N Patagonian Andes	X			Argentina	24/4/28
NE Chubut	X			Argentina	27/25/52
NE Rio Negro	X			Argentina	33/28/61
Pampas	X			Argentina	24/22/46
Parana Delta	X			Argentina	18/12/30
S Chubut	X			Argentina	11/23/34
Terrestrial Fueguians	X			Argentina	22/31/53
Sources: González-José el al. 2001, González-José et al. 2002, González-José 2003.
aThe original nomenclature used by authors is not maintained.
References:
González-José R, Dahinten S L, Luis M A, Hernández M, Pucciarelli HM (2001) Craniometric variation and the settlement of the Americas: Testing hypotheses by means of R-matrix and matrix correlation analyses. Am J Phys Anthropol 116: 154–166.
González-José R, García-Moro C, Dahinten S, Hernández M (2002) Origin of Fueguian-Patagonians: an approach to population history and structure using R matrix and matrix permutation methods. Am J Hum Biol 14: 308–320.
González-José R (2003) El poblamiento de la Patagonia. Análisis de la variación craneofacial en el contexto del poblamiento americano. Tesis de doctorado. Universitat de Barcelona. Departamento de Biología Animal. Barcelona, España.

## Sheet: Mexico City
Table S1: Sample details concerning the Mexico City database, including Pinker's sociocultural classifications.
Mexico City database	Nonstate societies		State societies	Country/region	Sample Size
Sample namea	Simple nomadic hunter-gatherer	More complex forager- horticulturalists and/or pastoralists			female/male/total
Mexico City Penitentiary (homicide)			X	Mexico City	0/58/58
Mexico City Penitentiary (robbery)			x	Mexico City	0/42/42
Mexico City Penitentiary (other)			x	Mexico City	0/7/7
Mexico City general population			x	Mexico City	27/56/83
Sources: Bautista & Pijoan 1998
aThe original nomenclature used by authors is not maintained.
References:
Bautista J, Pijoan C M (1998) Craneometría de reos: colección procedente de la penitenciaría del Distrito Federal. Cd. de México. Instituto Nacional de Antropología e Historia.

## Sheet: Hallstatt
Table S1: Sample details concerning the Hallstatt database, including Pinker's sociocultural classifications.
Hallstatt database	Nonstate societies		State societies	Country/region
Sample name	Simple nomadic hunter-gatherer	More complex			Sample Size
		forager- horticulturalists and/or pastoralists			female/male/total
Hallstatt			X	Austria	0/179/179
